# Supplementary material
Source: PubMed Central journal article supplement (PMC166274)

MEJA 0  
MEJA 1  
MEJA 2  
MEJA 3  
MEJA 4  
MEJA 5  
MEJA 6  
MEJA 7  
MEJA 8  
MEJA 9  
MEJA 10  
MEJA 11  
MEJA 12  
MEJA 13  
MEJA 14  
MEJA 15  
MEJA 16  
MEJA 18  
MEJA 20  
MEJA 24  
MEJA 36  
MEJA 48  
DMSO 0  
DMSO 2  
DMSO 4  
DMSO 6  
DMSO 8  
DMSO 10  
DMSO 12  
DMSO 14  
DMSO 16  
DMSO 24  
DMSO 36  
DMSO 48

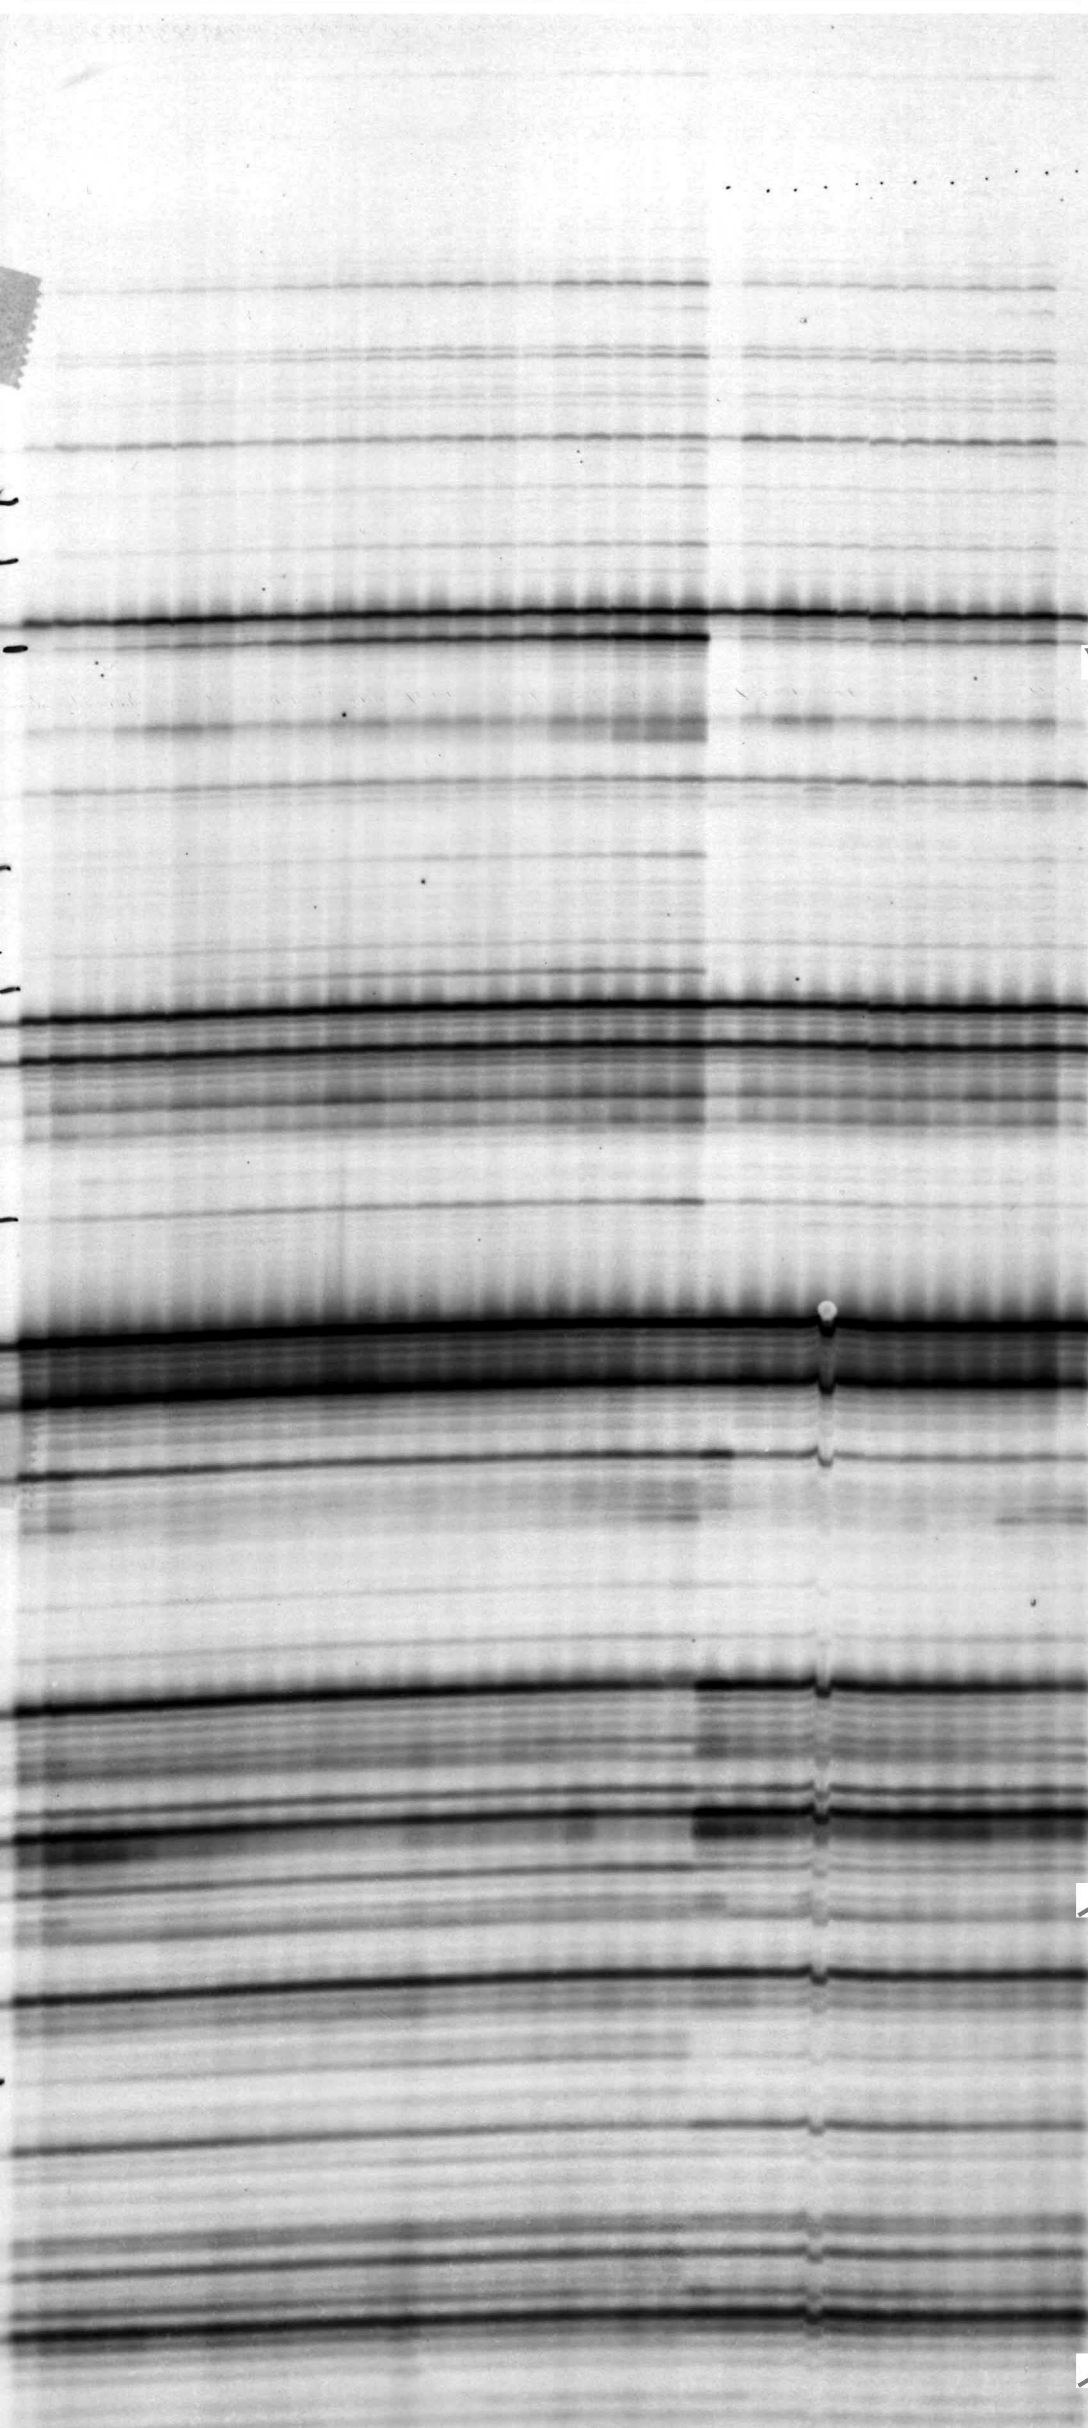

MEJA 0  
MEJA 1  
MEJA 2  
MEJA 3  
MEJA 4  
MEJA 5  
MEJA 6  
MEJA 7  
MEJA 8  
MEJA 9  
MEJA 10  
MEJA 11  
MEJA 12  
MEJA 13  
MEJA 14  
MEJA 15  
MEJA 16  
MEJA 18  
MEJA 20  
MEJA 24  
MEJA 36  
MEJA 48  
DMSO 0  
DMSO 2  
DMSO 4  
DMSO 6  
DMSO 8  
DMSO 10  
DMSO 12  
DMSO 14  
DMSO 16  
DMSO 24  
DMSO 36  
DMSO 48

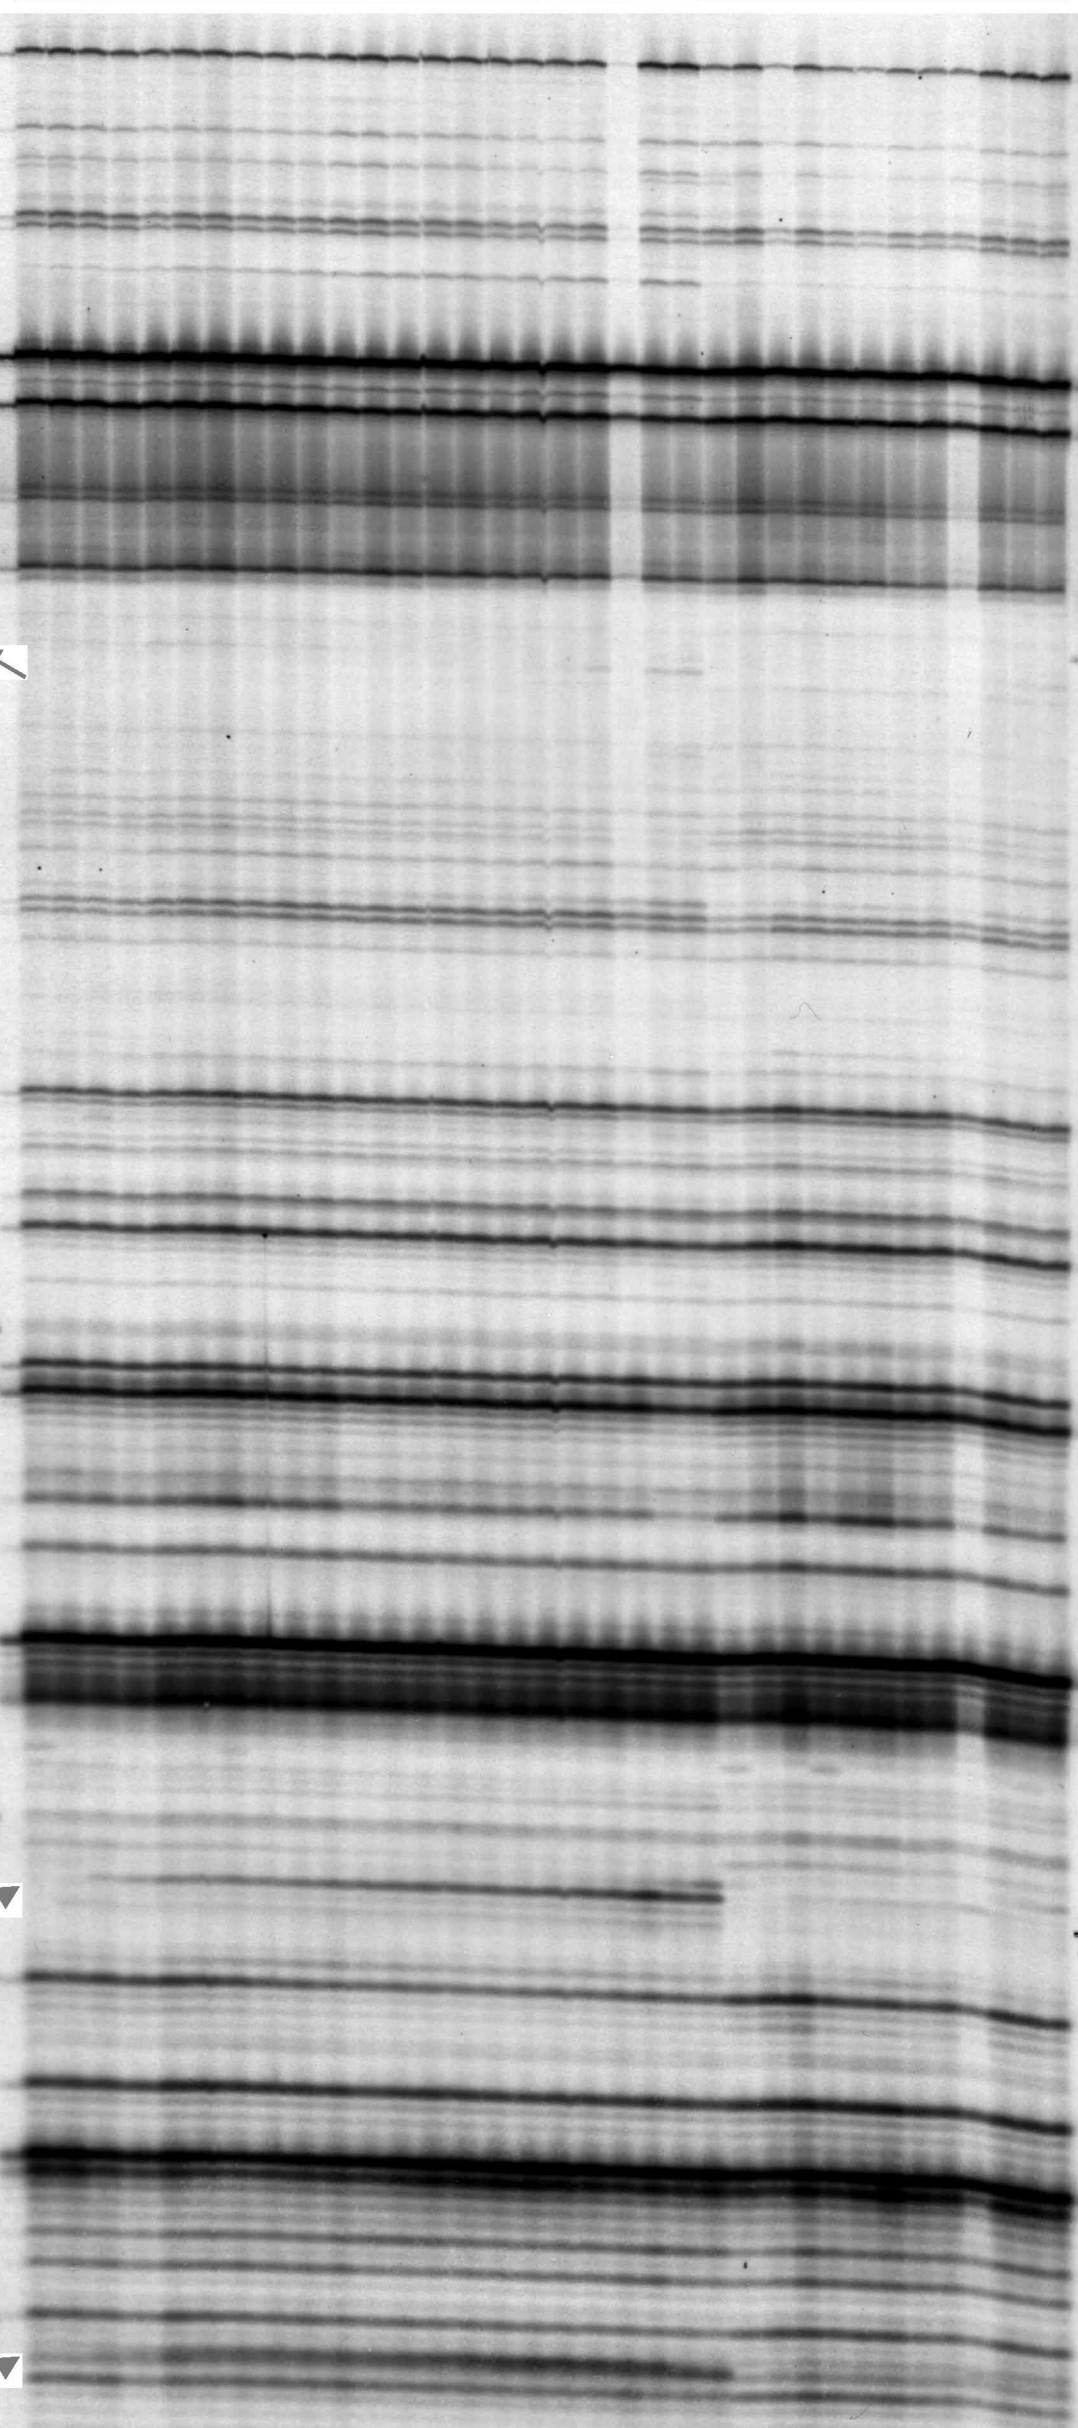

Supplement: pnas_100_14_8595__2.pdf [file pnas_100_14_8595__2.pdf]
