# Supplementary material
Source: PubMed Central journal article supplement (PMC166274)
Supplement: pnas_100_14_8595__10.pdf [file pnas_100_14_8595__10.pdf]

MEJA 0  
MEJA 1  
MEJA 2  
MEJA 4  
MEJA 6  
MEJA 8  
MEJA 10  
MEJA 12  
MEJA 16  
MEJA 24  
MEJA 48  
DMSO 0  
DMSO 4  
DMSO 8  
DMSO 12  
DMSO 24  
DMSO 48

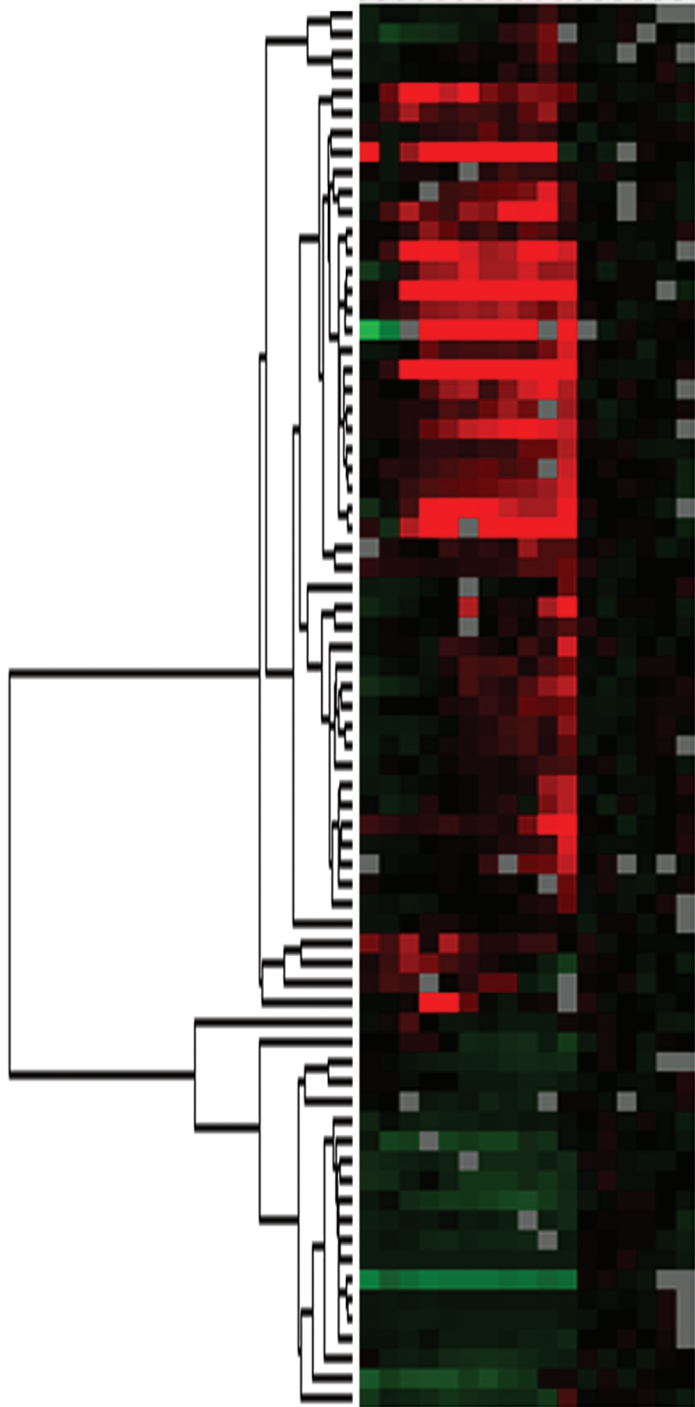

T211-BT2M3-3-No hit  
C112-BC1M4-2=putative protein At3g11810 [Arabidopsis thaliana]  
T131-BT12M3-6-No hit  
C408-BC4M2-1=beta-glucan binding protein  
T434-BT42M4-5=putative SGPI monomeric G-protein  
C209-BC24M2-3=N.tabacum DNA (recombination breakpoint between T-DNA and plant DNA)  
T314-BT32M1-1=clonazepam factor-1 alpha  
C168-BC14M1-4-No hit  
C22-BC21M4-3=ribonucleotide reductase  
C419-BC41M4-2=putative potassium transporter  
C137-BC13M1-3=retrotransposon copia-like  
T315-BT32M1-2=probable glutathione S-transferase PARA  
T164-BT14M1-3=probable glutathione S-transferase PARA  
T402-BT41M2-2=phenylalanine ammonia lyase  
C449-BC43M1-1=vacuolar H(+)-ATPase  
C228-BC24M4-3=arginine decarboxylase  
T32-BC22M2-1-No hit  
C359-BC33M4-2=putative protein kinase  
T357-BT34M2-3=endo-1,3-1,4-beta-D-glucanase  
T114-BT12M1-8-No hit  
T9-BT21M2-1=putative adenosine kinase  
T345-BT33M4-6-No hit  
T351-BT34M1-3-No hit  
T362-BT34M3-2-No hit  
T358-BT34M2-4-No hit  
T305-BT31M2-1=arabinoxylan-protein  
C18-BC21M4-1=RNA-binding-like protein  
C364-BC34M1-1=heme oxygenase  
C146-BC13M4-2-No hit  
C207-BC24M2-1=N.tabacum DNA (recombination breakpoint between T-DNA and plant DNA)  
MT112-M3BT1-3-No hit  
C304-BC31M1-4-F1-ATPase alpha subunit  
C333-BC34M4-3=dihydrofolinamide dehydrogenase  
C358-BC33M4-1=putative potassium transporter  
C430-BC42M2-1=vacuolar H(+)-ATPase subunit-like protein  
C425-BC42M1-2=vacuolar H(+)-ATPase subunit-like protein  
T421-BT43M3-3=high-affinity nitrate transporter  
C445-BC42M4-5=putative inorganic pyrophosphatase  
C410-BC41M2-3=40S ribosomal protein S3a  
C331-BC34M4-1=putative protein At3g62270 [Arabidopsis thaliana]  
C338-BC33M3-1=putative protein P0401G10.6 [Orzya sativa]  
C328-BC34M3-1=putative protein P0401G10.6 [Orzya sativa]  
C134-BC12M4-5-No hit  
C485-BC44M4-4=putative vacuolar ATP synthase proteolipid subunit  
T327-BT33M2-1=expansin  
C443-BC42M4-3=potassium transporter  
T113-BT12M1-7=probable glutathione S-transferase PARA  
MT407-M4BT4-1=probable glutathione S-transferase PARA  
C206-BC24M1-2=N.tabacum DNA (recombination breakpoint between T-DNA and plant DNA)  
C102-BC11M1-2=mitochondrial ribosomal protein  
MT401-M1BT4-1=probable glutathione S-transferase PARA  
T28-BT22M1-4-No hit  
C350-BC32M3-1=putative protein At3g52110 [Arabidopsis thaliana]  
T226-BT24M4-1-No hit  
T18-BT21M4-1=pathogenesis-related protein  
C201-BC23M2-1=putative protein At5g44670 [Arabidopsis thaliana]  
C178-BC14M3-5=auxin-induced protein IAA  
MT207-M2BT2-2=ooly(A)-binding protein  
T337-BT33M3-3=putative protein At3g52110 [Arabidopsis thaliana]  
MC402-M1BC4-2=putative beta-1,3-glucanase  
C157-BC12M4-6=zinc-binding protein  
C7-BC21M1-7-No hit  
T331-BT33M2-5=RNA polymerase beta''  
C216-BC24M3-3=N.tabacum DNA (recombination breakpoint between T-DNA and plant DNA)  
T204-BT23M2-2-No hit  
T153-BT13M3-3=hyoscyamine 6 beta-hydroxylase like protein  
T109-BT12M1-3=small subunit ribosomal RNA  
C323-BC34M2-2=amino acid transport protein AAT1  
C340-BC33M3-3-No hit  
C150-BC12M1-4=putative aminotransferase-like protein  
T26-BT22M1-2-No hit
