# Supplementary material
Source: PubMed Central journal article supplement (PMC166274)

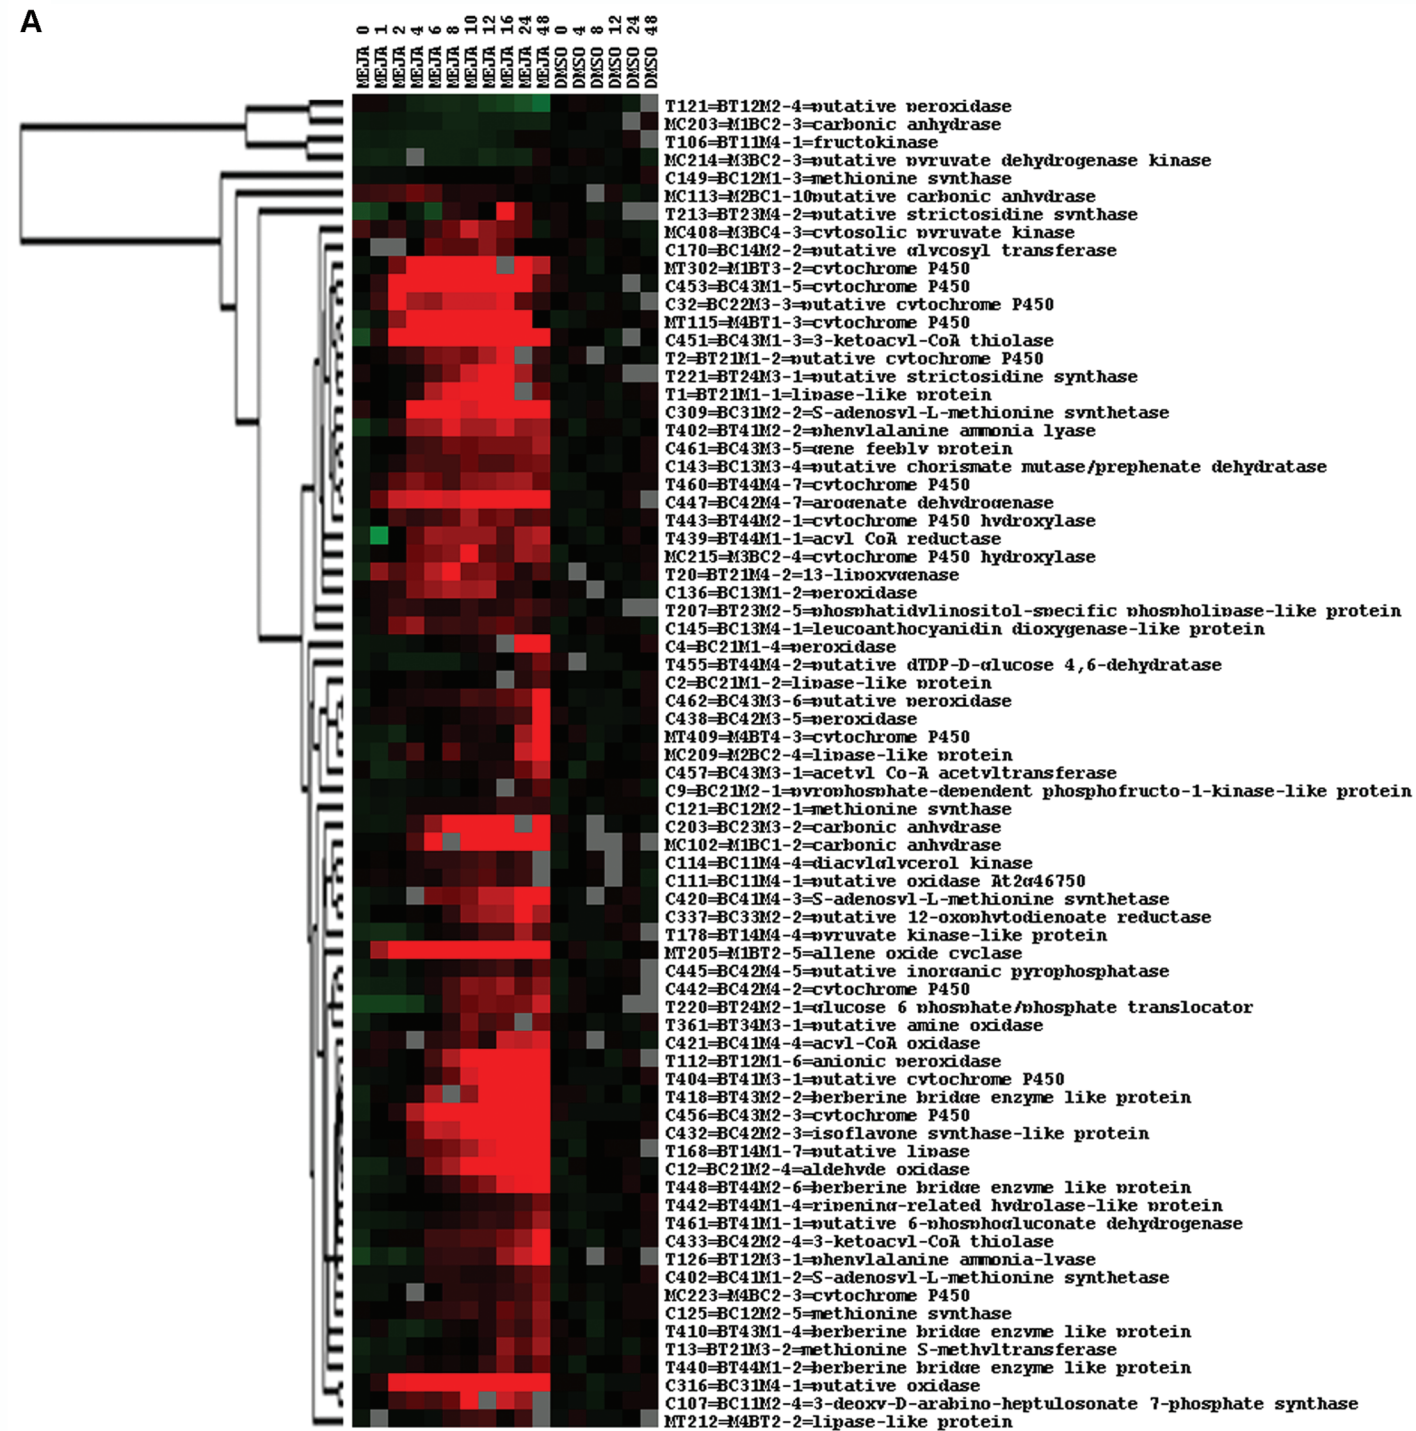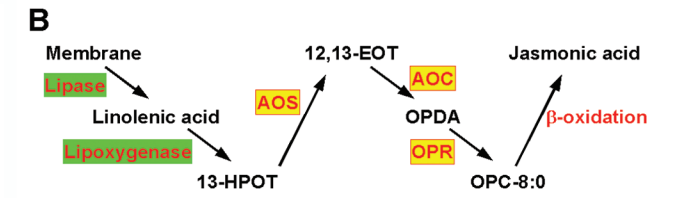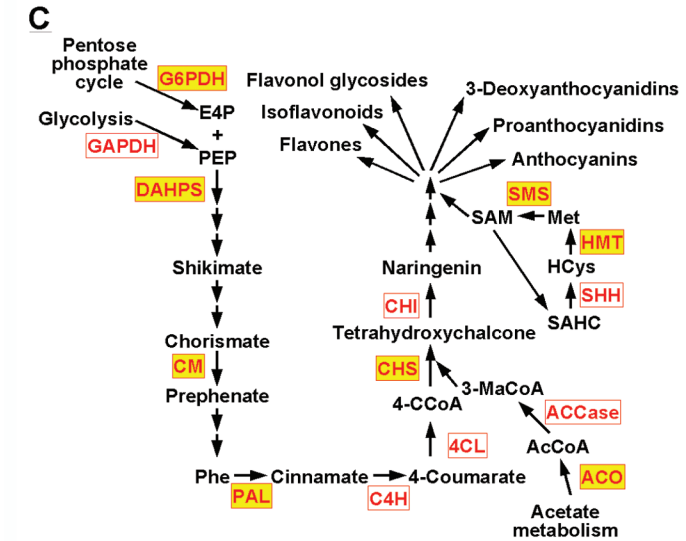

Supplement: pnas_100_14_8595__5.pdf [file pnas_100_14_8595__5.pdf]
